# Supplementary material
Source: PubMed Central journal article supplement (PMC6743056)
Supplement: jamaotolaryngolheadnecksurg-145-1020-s001.pdf [file jamaotolaryngolheadnecksurg-145-1020-s001.pdf]

## Supplementary Online Content

Kim J-Y, Ko I, Kim D-K. Association of obstructive sleep apnea with the risk of affective disorders. *JAMA Otolaryngol Head Neck Surg*. Published online September 12, 2019. doi:10.1001/jamaoto.2019.2435

**eAppendix.** Korea National Health Insurance Service

**eTable 1.** Korean Classification of Diseases diagnostic practice codes selected from the 2002–2013 Korea National Health Insurance Service–National Sample Cohort

**eTable 2.** Characteristics of the study subjects

**eTable 3.** Characteristics of study participants

**eTable 4.** A summary of events and censoring in this cohort study

This supplementary material has been provided by the authors to give readers additional information about their work.

**eAppendix. Korea National Health Insurance Service**

The national health insurance has provided health coverage to the entire South Korean population since 1989. An insured individual pays a national health insurance fee that is proportional to the individual's income. Although a user charge exists, it is mandatory for all Koreans to join the Korean National Health Insurance Service (KNHIS). Each South Korean resident is assigned a unique identification number at birth, which is used by the KNHIS to identify each individual. Thus, healthcare claim data are not omitted or duplicated. Most (97.1%) Koreans are mandatory subscribers. The remaining 3% of the population with low incomes are covered by the Medical Aid program. Since 2006, the information on Medical Aid beneficiaries has been incorporated into the KNHIS database. Therefore, data extracted from the KNHIS database are indeed based on the entire Korean population, eliminating selection bias. In addition, the KNHIS controls all medical costs among beneficiaries, medical providers, and the government. Nearly all medical data, including diagnostic codes, procedures, prescription drugs, and personal information, are included in the KNHIS database. The KNHIS utilizes the Korean Classification of Diseases diagnostic practice codes, which are similar to those of the International Classification of Diseases.

**eTable 1.** Korean Classification of Diseases diagnostic practice codes selected from the 2002–2013 Korea National Health Insurance Service–National Sample Cohort

| Variable                | KCD diagnostic code                             |
|-------------------------|-------------------------------------------------|
| Obstructive sleep apnea | G47.3                                           |
| Depressive disorder     | F32.x, F33.x, F34.1                             |
| Anxiety disorder        | F40.0, F40.1, F40.2, F41.0, F41.1, F41.8, F41.9 |
| Hypertension            | I10                                             |
| Diabetes mellitus       | E10, E11, E12, E13, E14                         |
| Chronic kidney disease  | N18                                             |

KCD = Korean Classification of Diseases

**eTable 2.** Characteristics of the study subjects

| <b>Variables</b>          | <b>Comparison</b> | <b>OSA</b>  | <b><i>p</i>-Value</b> |
|---------------------------|-------------------|-------------|-----------------------|
| Sex                       |                   |             | 1.000                 |
| Male                      | 696 (86.6%)       | 174 (86.6%) |                       |
| Female                    | 108 (13.4%)       | 27 (13.4%)  |                       |
| Age (years)               |                   |             | 1.000                 |
| <45                       | 444 (55.2%)       | 111 (55.2%) |                       |
| 45-64                     | 321 (39.9%)       | 81 (40.3%)  |                       |
| >64                       | 39 (4.9%)         | 9 (4.5%)    |                       |
| Residence                 |                   |             | 0.994                 |
| Seoul (metropolitan)      | 267 (33.2%)       | 66 (32.8%)  |                       |
| Other metropolitan cities | 132 (16.4%)       | 33 (16.4%)  |                       |
| Small cities, rural       | 405 (50.4%)       | 102 (50.7%) |                       |
| Household income          |                   |             | 0.993                 |
| Low (0-30%)               | 104 (12.9%)       | 26 (12.9%)  |                       |
| Middle (30-70%)           | 241 (30.0%)       | 61 (30.3%)  |                       |
| High (70-100%)            | 459 (57.1%)       | 114 (56.7%) |                       |
| Disability                |                   |             | 0.794                 |
| No                        | 786 (97.8%)       | 196 (97.5%) |                       |
| Yes                       | 18 (2.2%)         | 5 (2.5%)    |                       |
| Comorbidities             |                   |             | 1.000                 |
| No                        | 532 (66.2%)       | 133 (66.2%) |                       |
| Yes                       | 272 (33.8%)       | 68 (33.8%)  |                       |

OSA = Obstructive sleep apnea.

**eTable 3.** Characteristics of study participants

| <b>Variables</b>             | <b>Comparison (n=788)</b> | <b>OSA (n=197)</b> | <b>Effect size</b> | <b>95% CI</b>       | <b><math>\chi^2</math></b> |
|------------------------------|---------------------------|--------------------|--------------------|---------------------|----------------------------|
| <b>Sex</b>                   |                           |                    | <b>0.000</b>       | <b>-0.156-0.156</b> | <b>0.000</b>               |
| Male                         | 688 (87.3%)               | 172 (87.3%)        |                    |                     |                            |
| Female                       | 100 (12.7%)               | 25 (12.7%)         |                    |                     |                            |
| <b>Ages (years)</b>          |                           |                    | <b>0.000</b>       | <b>-0.156-0.156</b> | <b>0.000</b>               |
| <45                          | 432 (54.8%)               | 108 (54.8%)        |                    |                     |                            |
| 45-64                        | 324 (41.1%)               | 81 (41.1%)         |                    |                     |                            |
| >64                          | 32 (4.1%)                 | 8 (4.1%)           |                    |                     |                            |
| <b>Residence</b>             |                           |                    | <b>0.000</b>       | <b>-0.156-0.156</b> | <b>0.000</b>               |
| Most Metropolitan            | 252 (32.0%)               | 63 (32.0%)         |                    |                     |                            |
| Other metropolitan<br>Cities | 132 (16.8%)               | 33 (16.8%)         |                    |                     |                            |
| Small cities, rural          | 404 (51.3%)               | 101 (51.3%)        |                    |                     |                            |
| <b>Household income</b>      |                           |                    | <b>0.000</b>       | <b>-0.156-0.156</b> | <b>0.000</b>               |
| Low (0-30%)                  | 100 (12.7%)               | 25 (12.7%)         |                    |                     |                            |
| Middle (30-70%)              | 240 (30.5%)               | 60 (30.5%)         |                    |                     |                            |
| High (70-100%)               | 448 (56.9%)               | 112 (56.9%)        |                    |                     |                            |
| <b>Disability</b>            |                           |                    | <b>0.000</b>       | <b>-0.156-0.156</b> | <b>0.000</b>               |
| No                           | 768 (97.5%)               | 192 (97.5%)        |                    |                     |                            |
| Yes                          | 20 (2.5%)                 | 5 (2.5%)           |                    |                     |                            |
| <b>Comorbidities</b>         |                           |                    | <b>0.000</b>       | <b>-0.156-0.156</b> | <b>0.000</b>               |
| No                           | 528 (67.0%)               | 132 (67.0%)        |                    |                     |                            |
| Yes                          | 260 (33.0%)               | 65 (33.0%)         |                    |                     |                            |

Data reported as n (%). OSA, obstructive sleep apnea; CI, confidence interval. Most metropolitan is Seoul.

**eTable 4.** A summary of events and censoring in this cohort study

|                              | <b>Affective disorder</b> | <b>Depressive disorder</b> | <b>Anxiety disorder</b> |
|------------------------------|---------------------------|----------------------------|-------------------------|
| Event                        | 240                       | 117                        | 180                     |
| Total censored (No event)    | 745                       | 868                        | 805                     |
| Termination of study         | 742                       | 865                        | 802                     |
| Loss to follow up / Drop-out | 3                         | 3                          | 3                       |
